# Supplementary material for: Trends in hospitalization, mortality, and timing of colonoscopy in patients with acute lower gastrointestinal bleeding
Source: PubMed Central journal article supplement — Endosc Int Open. 2021 May 27;9(6):E777–89. doi: 10.1055/a-1352-3204 (PMC8159619; doi:10.1055/a-1352-3204), 2021-05-27
Supplement: 2070supmat_10-1055-a-1352-3204.pdf [file 2070supmat_10-1055-a-1352-3204.pdf]

## Supplementary material

Supplementary Figure 1

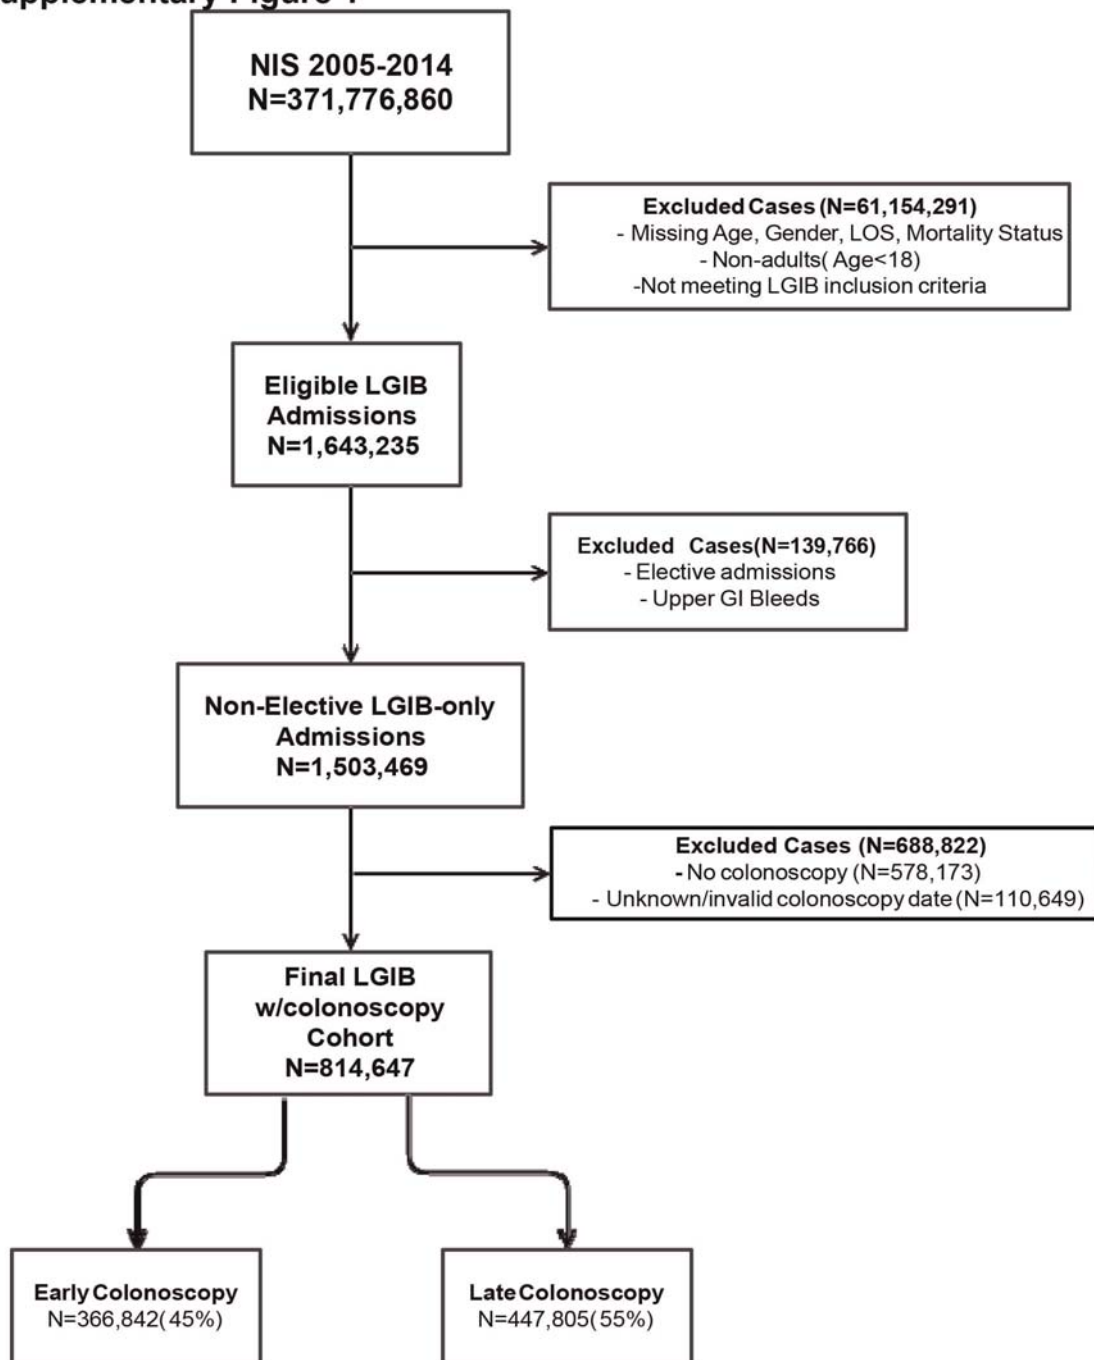

## Supplementary material

**Supplementary Table 1** ICD-9-CM and ICD-9-PR codes to identify LGIB patients and colonoscopy.

|                                                            |                            |
|------------------------------------------------------------|----------------------------|
| Primary diagnosis (DX1) (any of the 4):                    |                            |
| Diverticular bleeding                                      | 562.12, 562.13             |
| Anorectal hemorrhage                                       | 569.3, 455.2, 455.5, 455.8 |
| Intestinal arteriovenous malformations                     | 569.85                     |
| Dieulafoy lesion                                           | 569.86                     |
| As DX1 (either of the two):                                |                            |
| Acute hemorrhagic anemia                                   | 285.1                      |
| Unspecified lower GI bleeding                              | 578.9                      |
| WITH at least one of the following secondaries (DX2-DX15): |                            |
| Non-infectious colitis Colonic                             | 211.3, 211.4               |
| ulcer Ischemic colitis                                     | 558.*                      |
| colitis                                                    | 569.82                     |
| Inflammatory bowel disease Solitary rectal                 | 557.*                      |
|                                                            | 555.*, 556.*               |
|                                                            | 569.41                     |
|                                                            | 152.*, 153.*, 154.*, 230.* |

## Supplementary material

Anal fissure 565.0

Infectious colitis 009.\*

Colonoscopy (procedure codes) 45.22, 45.23, 45.24, 45.25, 45.42, 45.43

ICD-9-CM, International Classification of Diseases 9<sup>th</sup> revision Clinical Modification; PR, procedure code; DX, diagnosis

## Supplementary material

**Supplementary Table 2** ICD-9-CM and ICD-9-PR codes to identify

| UGIB and EGD.                                                                                                                         |                                                                                                                                                                                                                                                                |
|---------------------------------------------------------------------------------------------------------------------------------------|----------------------------------------------------------------------------------------------------------------------------------------------------------------------------------------------------------------------------------------------------------------|
| Primary diagnosis (DX1)(any of the 7):                                                                                                |                                                                                                                                                                                                                                                                |
| Gastric, duodenal, peptic ulcer with hemorrhage                                                                                       | 531.00, 531.01, 531.20, 531.21, 531.40, 431.41, 531.60, 531.61, 533.00, 533.01, 533.20, 533.21, 533.40, 533.41, 533.60, 533.61, 534.00, 534.01, 534.20, 534.21, 534.40, 534.41, 534.60, 534.61, 532.00, 532.01, 532.20, 532.21, 532.40, 532.41, 532.60, 532.61 |
| Gastritis and duodenitis with hemorrhage                                                                                              | 535.01, 535.11, 535.21, 535.31, 535.41, 535.51, 535.61                                                                                                                                                                                                         |
| Variceal bleeding                                                                                                                     | 456.0, 456.20                                                                                                                                                                                                                                                  |
| Esophageal ulcer with hemorrhage                                                                                                      | 530.21                                                                                                                                                                                                                                                         |
| Mallory-Weiss syndrome                                                                                                                | 530.7                                                                                                                                                                                                                                                          |
| Angiodysplasia of stomach and duodenum with hemorrhage                                                                                | 537.83                                                                                                                                                                                                                                                         |
| Dieulafoy lesion (hemorrhagic) of stomach and duodenum                                                                                | 537.84                                                                                                                                                                                                                                                         |
| As DX1 (either one of these):                                                                                                         |                                                                                                                                                                                                                                                                |
| Melena, hematemesis, hemorrhage of GI tract, acute blood loss, anemia WITH at least one of the following secondaries (DX2-DX15):      | 578.9, 578.1, 285.1, 578.0                                                                                                                                                                                                                                     |
| Esophagitis, esophageal ulcer                                                                                                         | 530.20, 530.1, 530.10, 530.12                                                                                                                                                                                                                                  |
| Malignant neoplasm of esophagus, stomach or duodenum                                                                                  | 150.0, 150.1, 150.2, 150.3, 150.4, 150.5, 150.9, 150.8, 537.89, 151.0, 151.1, 151.2, 151.3, 151.4, 151.5, 151.6, 151.8, 151.9, 152.0                                                                                                                           |
| EGD (procedure codes)                                                                                                                 | 42.23, 42.24, 42.33, 44.13, 44.14, 44.43, 45.13, 45.14, 45.16                                                                                                                                                                                                  |
| ICD-9-CM, International Classification of Diseases 9 <sup>th</sup> revision Clinical Modification; PR, procedure code; DX, diagnosis. |                                                                                                                                                                                                                                                                |

## Supplementary material

**Supplementary Table 3** Miscellaneous ICD-9-CM and ICD-9-PR codes.

| Other diagnoses:                    |                                                                                                                                                                   |
|-------------------------------------|-------------------------------------------------------------------------------------------------------------------------------------------------------------------|
| Acute renal failure                 | 584.5, 584.6, 584.7, 584.8, 584.9                                                                                                                                 |
| Blood transfusion (procedure codes) | 99.03, 99.04                                                                                                                                                      |
| Colostomy, colectomy (procedure)    | 45.41, 45.90, 45.91, 45.92, 45.93, 45.94,<br>45.71, 45.72, 45.73, 45.74, 45.75, 45.76,<br>45.81, 45.82, 45.83, 46.10, 46.11, 46.12,<br>46.20, 46.21, 46.22, 46.23 |
| ICU Admission (procedure codes)     | 96.72, 96.70, 38.91, 89.61, 89.62                                                                                                                                 |

ICD-9-CM, International Classification of Diseases 9<sup>th</sup> revision Clinical Modification; PR, procedure code; ICU, intensive care unit.

**Supplementary Table 4** Charlson Comorbidity Index scoring system.

|                                                 |           |           |
|-------------------------------------------------|-----------|-----------|
| Myocardial infarction                           | 0         | 1         |
| Congestive heart failure                        | 2         | 1         |
| Peripheral vascular disease                     | 0         | 1         |
| Cerebrovascular disease                         | 0         | 1         |
| Dementia                                        | 2         | 1         |
| Chronic pulmonary disease                       | 1         | 1         |
| Rheumatologic disease                           | 1         | 1         |
| Peptic ulcer disease                            | 0         | 1         |
| Mild liver disease                              | 2         | 1         |
| Diabetes without chronic complications          | 0         | 1         |
| Diabetes with chronic complications             | 1         | 2         |
| Hemiplegia or paraplegia                        | 2         | 2         |
| Renal disease                                   | 1         | 2         |
| Any malignancy, including leukemia and lymphoma | 2         | 2         |
| Moderate or severe liver disease                | 4         | 3         |
| Metastatic solid tumor                          | 6         | 6         |
| AIDS/HIV                                        | 4         | 6         |
| <b>Maximum comorbidity score</b>                | <b>24</b> | <b>29</b> |
